# Supplementary material
Source: PubMed Central journal article supplement (PMC6697302)
Supplement: JGMED1801018.pdf [file JGMED1801018.pdf]

**Supplemental Material**

**TABLE 1**  
 OMSB Residency and Fellowship Programs' Accreditation Status, Duration, and Total Number of Residents

| <b>Program</b>              | <b>Accreditation Status</b>          | <b>Accreditation Effective Date</b> | <b>Accreditation Cycle Duration (y)</b> | <b>Accredited Program Duration</b> | <b>No. of Residents as of November 2018</b> |
|-----------------------------|--------------------------------------|-------------------------------------|-----------------------------------------|------------------------------------|---------------------------------------------|
| Histopathology              | Initial Accreditation <sup>a</sup>   | July 1, 2016                        | 2                                       | 5                                  | 9                                           |
| Orthopedics                 | Initial Accreditation                | July 1, 2017                        | 2                                       | 5                                  | 19                                          |
| Anesthesia                  | Initial Accreditation                | July 1, 2017                        | 2                                       | 5                                  | 28                                          |
| Psychiatry                  | Initial Accreditation                | July 1, 2017                        | 2                                       | 5                                  | 29                                          |
| Family Medicine             | Initial Accreditation                | July 1, 2017                        | 2                                       | 4                                  | 75                                          |
| Ophthalmology <sup>b</sup>  | Initial Accreditation                | July 1, 2017                        | 2                                       | 4                                  | 10                                          |
| Dermatology                 | Initial Accreditation <sup>a</sup>   | July 1, 2017                        | 2                                       | 4                                  | 11                                          |
| Internal Medicine           | Continued Accreditation              | July 19, 2018                       | 2                                       | 4                                  | 80                                          |
| Emergency Medicine          | Continued Accreditation              | July 20, 2018                       | 2                                       | 5                                  | 36                                          |
| Pediatrics                  | Continued Accreditation              | July 19, 2018                       | 3                                       | 4                                  | 78                                          |
| General Surgery             | Continued Accreditation              | July 20, 2018                       | 3                                       | 5                                  | 24                                          |
| Radiology                   | Continued Accreditation              | July 20, 2018                       | 4                                       | 5                                  | 40                                          |
| ENT                         | Continued Accreditation              | January 10, 2019                    | 2                                       | 6                                  | 26                                          |
| OB-GYN                      | Continued Accreditation              | January 10, 2019                    | 2                                       | 6                                  | 38                                          |
| Hematology                  | Continued Accreditation <sup>a</sup> | January 10, 2019                    | 2                                       | 5                                  | 14                                          |
| Microbiology                | Continued Accreditation <sup>a</sup> | January 10, 2019                    | 2                                       | 5                                  | 17                                          |
| Adult Diabetes <sup>c</sup> | NA                                   | NA                                  | NA                                      | 1                                  | 4                                           |

<sup>a</sup> Foundational Accreditation only.

<sup>b</sup> OMSB Ophthalmology program is 5 years with a total of 14 residents. The accredited years are from year 1 to 4.

<sup>c</sup> Fellowship program.

**TABLE 2**  
Steps, Challenges and Tips Toward International Accreditation

|             | <b>Phase 1<br/>Infrastructure Development</b>                                                                                                                                                                                                                                                                                                                                                                                                                                                                                                                                                                                                                                                                                                                                                                                                                                                                                                                                                                                                                                                                                                                                                       | <b>Phase 2<br/>Institutional Accreditation</b>                                                                                                                                                                                                                                                                                                                                                                                                                                                                                                                                                                                                                                                                                                                                                                                                                                                                                                                                                                                                                                                                | <b>Phase 3<br/>Program Accreditation</b>                                                                                                                                                                                                                                                                                                                                                                                                                                                                                                                                                                                                                                                                                                                                                                                                                                                                                                                                                                                                                                                                                                                                                                       |
|-------------|-----------------------------------------------------------------------------------------------------------------------------------------------------------------------------------------------------------------------------------------------------------------------------------------------------------------------------------------------------------------------------------------------------------------------------------------------------------------------------------------------------------------------------------------------------------------------------------------------------------------------------------------------------------------------------------------------------------------------------------------------------------------------------------------------------------------------------------------------------------------------------------------------------------------------------------------------------------------------------------------------------------------------------------------------------------------------------------------------------------------------------------------------------------------------------------------------------|---------------------------------------------------------------------------------------------------------------------------------------------------------------------------------------------------------------------------------------------------------------------------------------------------------------------------------------------------------------------------------------------------------------------------------------------------------------------------------------------------------------------------------------------------------------------------------------------------------------------------------------------------------------------------------------------------------------------------------------------------------------------------------------------------------------------------------------------------------------------------------------------------------------------------------------------------------------------------------------------------------------------------------------------------------------------------------------------------------------|----------------------------------------------------------------------------------------------------------------------------------------------------------------------------------------------------------------------------------------------------------------------------------------------------------------------------------------------------------------------------------------------------------------------------------------------------------------------------------------------------------------------------------------------------------------------------------------------------------------------------------------------------------------------------------------------------------------------------------------------------------------------------------------------------------------------------------------------------------------------------------------------------------------------------------------------------------------------------------------------------------------------------------------------------------------------------------------------------------------------------------------------------------------------------------------------------------------|
| Years       | 2012–2014 (pre-agreement)<br>2014–2015 (post agreement)                                                                                                                                                                                                                                                                                                                                                                                                                                                                                                                                                                                                                                                                                                                                                                                                                                                                                                                                                                                                                                                                                                                                             | 2015                                                                                                                                                                                                                                                                                                                                                                                                                                                                                                                                                                                                                                                                                                                                                                                                                                                                                                                                                                                                                                                                                                          | 2016 onwards                                                                                                                                                                                                                                                                                                                                                                                                                                                                                                                                                                                                                                                                                                                                                                                                                                                                                                                                                                                                                                                                                                                                                                                                   |
| Steps taken | <ul style="list-style-type: none"> <li>• Obtain support from institution leadership to pursue international accreditation</li> <li>• Conduct detailed and comprehensive review of ACGME-I institutional, foundational and program specific requirements</li> <li>• Select an individual with strong leadership skills and medical education experience                             <ul style="list-style-type: none"> <li>○ In our case, the OMSB vice-president for academic affairs fulfilled the criteria</li> <li>○ In addition, Associate DIO at major training sites were appointed as well as PGMEC offices</li> </ul> </li> <li>• Identify key GME office staff</li> <li>• Develop a comparison table identifying where we meet requirements and potential areas of non-compliance that require additional preparation</li> <li>• Develop detailed implementation plan for the phased implementation of key changes required within the system</li> <li>• Sign agreement</li> <li>• Work on developing structures and policies                             <ul style="list-style-type: none"> <li>○ Create GMEC, identify key members, develop GMEC committee remits</li> </ul> </li> </ul> | <ul style="list-style-type: none"> <li>• Review of the ACGME-I Sponsoring Institution requirements and check for compliance</li> <li>• GMEC minutes—Proper documentation—Discussion of all required topics, eg, stipends and benefits, program changes, etc.</li> <li>• Hospital Accreditation—Review of the status of participating sites’ accreditation status (international, eg, JCI or equivalent)</li> <li>• Review and revision, if any, of Institutional policies to meet ACGME-I requirements</li> <li>• Update Sponsoring Institution information in ADS including:                             <ul style="list-style-type: none"> <li>○ Answer to citations</li> <li>○ Institutional Review questions</li> <li>○ Major Changes</li> <li>○ Competency Question Assessment</li> </ul> </li> <li>• Collect all pertinent documents for site visit                             <ul style="list-style-type: none"> <li>○ GMEC minutes</li> <li>○ OMSB policies and guidelines</li> <li>○ GME annual reports</li> </ul> </li> <li>• Logistics for the site visit to be prepared by GME Office</li> </ul> | <p><i>Filling the application</i></p> <ul style="list-style-type: none"> <li>• Communicate with program directors regarding ACGME-I initial or continued accreditation</li> <li>• Communicate with ACGME-I regarding the programs applying for accreditation</li> <li>• ACGME-I communicates the dates of the program site visits</li> <li>• DIO opens the applications in ADS (new programs) or programs update their information in ADS (continued accreditation)</li> <li>• Ensure curriculum is in line with ACGME-I requirements</li> <li>• Ensure program letters of agreement are signed and executed</li> <li>• Ensure that documents for onsite review are available and current</li> <li>• Programs should start collecting statistics/information as required in the application documents or program information forms (PIF) and the required attachments</li> <li>• Programs to submit applications in ADS to DIO for review</li> <li>• DIO review the forms and returns to programs as needed</li> <li>• DIO meets with PD and PA to go over the revisions and suggestions regarding the forms</li> <li>• Programs makes changes as needed, and resubmit the application forms in ADS</li> </ul> |

|  |                                                                                                                                                                                                                                                                                                                                                                                                                                                                                                                                                                                                                                                                                                                                                                                                                                                                                                             |  |                                                                                                                                                                                                                                                                                                                                                                                                                                                                                                                                                                                                                                                                                                                                                                                                                                                                                                                                                                                                                                                                                                                                                                                                                                                                                                                                                                                                                                                                                                                                                                                                                                                                                             |
|--|-------------------------------------------------------------------------------------------------------------------------------------------------------------------------------------------------------------------------------------------------------------------------------------------------------------------------------------------------------------------------------------------------------------------------------------------------------------------------------------------------------------------------------------------------------------------------------------------------------------------------------------------------------------------------------------------------------------------------------------------------------------------------------------------------------------------------------------------------------------------------------------------------------------|--|---------------------------------------------------------------------------------------------------------------------------------------------------------------------------------------------------------------------------------------------------------------------------------------------------------------------------------------------------------------------------------------------------------------------------------------------------------------------------------------------------------------------------------------------------------------------------------------------------------------------------------------------------------------------------------------------------------------------------------------------------------------------------------------------------------------------------------------------------------------------------------------------------------------------------------------------------------------------------------------------------------------------------------------------------------------------------------------------------------------------------------------------------------------------------------------------------------------------------------------------------------------------------------------------------------------------------------------------------------------------------------------------------------------------------------------------------------------------------------------------------------------------------------------------------------------------------------------------------------------------------------------------------------------------------------------------|
|  | <ul style="list-style-type: none"> <li>○ Create PGMEC, identify key members, develop PGMEC merits</li> <li>○ Identify relations between PGMECs and GMEC</li> <li>○ Update existing policies and develop new ones to meet requirements</li> <li>● Introductory workshop by ACGME-I             <ul style="list-style-type: none"> <li>○ For key leaders</li> <li>○ Introduction to accreditation process, Accreditation Data System (ADS) and Q&amp;A.</li> </ul> </li> <li>● Awareness Campaign             <ul style="list-style-type: none"> <li>○ Q&amp;A sessions for all stakeholders</li> <li>○ Conducted within training centers</li> <li>○ Email blasts to faculty and residents including facts and bite sized information</li> <li>○ Promotional materials were developed (posters, brochures, etc.)</li> </ul> </li> <li>● Mock site visits for sponsoring institution and 4 programs</li> </ul> |  | <ul style="list-style-type: none"> <li>● DIO re-reviews and submits the applications to ACGME-I in ADS after GMEC approval</li> </ul> <p><i>The program site visit</i></p> <p><i>1.5 months prior to the site visit</i></p> <ul style="list-style-type: none"> <li>● Site visitor sends the tentative program for review of the program</li> <li>● Book the room for the meeting, program site visits             <ul style="list-style-type: none"> <li>○ As soon as the schedule is confirmed</li> </ul> </li> <li>● If the site visitor wants a hospital tour, the DIO writes to the hospital directors and arranges the tour</li> <li>● Program submits to the GME office the names of the faculty and residents meeting with the site visitor</li> <li>● Program collects all documents necessary for the site visit, for review and by GME Staff and the DIO</li> </ul> <p><i>1 month prior to the site visit</i></p> <ul style="list-style-type: none"> <li>● DIO writes a release letter for the faculty and residents to attend site visit meetings</li> <li>● DIO and PD meets with the faculty and residents participating in the site visit</li> </ul> <p><i>2 weeks prior to the site visit</i></p> <ul style="list-style-type: none"> <li>● Schedule is sent to the site visitor, including transport schedule</li> <li>● Program sends the list of faculty and residents to the site visitor</li> <li>● Coordinate pickup from the airport, visa processing and transport to the hotel on arrival as well as transport on departure</li> <li>● GME Office staff coordinates with administrative section regarding transportation during the site visit</li> <li>○</li> </ul> |
|--|-------------------------------------------------------------------------------------------------------------------------------------------------------------------------------------------------------------------------------------------------------------------------------------------------------------------------------------------------------------------------------------------------------------------------------------------------------------------------------------------------------------------------------------------------------------------------------------------------------------------------------------------------------------------------------------------------------------------------------------------------------------------------------------------------------------------------------------------------------------------------------------------------------------|--|---------------------------------------------------------------------------------------------------------------------------------------------------------------------------------------------------------------------------------------------------------------------------------------------------------------------------------------------------------------------------------------------------------------------------------------------------------------------------------------------------------------------------------------------------------------------------------------------------------------------------------------------------------------------------------------------------------------------------------------------------------------------------------------------------------------------------------------------------------------------------------------------------------------------------------------------------------------------------------------------------------------------------------------------------------------------------------------------------------------------------------------------------------------------------------------------------------------------------------------------------------------------------------------------------------------------------------------------------------------------------------------------------------------------------------------------------------------------------------------------------------------------------------------------------------------------------------------------------------------------------------------------------------------------------------------------|

|            |                                                                                                                                                                                                                                                                                                                                                                                                                                                                           |                                                                                                                                                                                                                                                                                           |                                                                                                                                                                                                                                                                                                                                                                                                                                                                                                                                                                                                                                                                                                                         |
|------------|---------------------------------------------------------------------------------------------------------------------------------------------------------------------------------------------------------------------------------------------------------------------------------------------------------------------------------------------------------------------------------------------------------------------------------------------------------------------------|-------------------------------------------------------------------------------------------------------------------------------------------------------------------------------------------------------------------------------------------------------------------------------------------|-------------------------------------------------------------------------------------------------------------------------------------------------------------------------------------------------------------------------------------------------------------------------------------------------------------------------------------------------------------------------------------------------------------------------------------------------------------------------------------------------------------------------------------------------------------------------------------------------------------------------------------------------------------------------------------------------------------------------|
| Resources  | <ul style="list-style-type: none"> <li>• Leadership</li> <li>• DIO</li> <li>• GME office staff</li> <li>• OMSB staff</li> <li>• Faculty</li> <li>• Residents</li> <li>• ACGME-I staff</li> <li>• Other international DIOs and program directors</li> <li>• Online resident management system</li> <li>• Emails</li> <li>• Face to face Q&amp;A sessions</li> </ul>                                                                                                        | <ul style="list-style-type: none"> <li>• DIO</li> <li>• GME office staff</li> <li>• GMEC</li> <li>• PGMEC</li> <li>• OMSB staff</li> <li>• Faculty</li> <li>• Residents</li> <li>• Other international DIOs and program directors</li> <li>• Online resident management system</li> </ul> | <ul style="list-style-type: none"> <li>• DIO</li> <li>• GME office staff</li> <li>• OMSB staff</li> <li>• Program directors</li> <li>• Program administrators</li> <li>• Faculty</li> <li>• Residents</li> <li>• Online resident management system</li> <li>• ADS</li> </ul>                                                                                                                                                                                                                                                                                                                                                                                                                                            |
| Challenges | <ul style="list-style-type: none"> <li>• OMSB unique structure hence involvement of multiple parties</li> <li>• Updating the language used for competencies and switching from CanMEDS to ACGME core competencies</li> </ul>                                                                                                                                                                                                                                              | <ul style="list-style-type: none"> <li>• Ensuring hospital accreditation</li> <li>• Ensuring documentation of all required materials</li> </ul>                                                                                                                                           | <ul style="list-style-type: none"> <li>• Difficulty in implementing some program specific requirements, eg, geriatrics, adolescent medicine, autopsies</li> <li>• Faculty CVs and scholarly activities. Programs must understand what qualifications are acceptable to ACGME-I for faculty appointment. Core faculty must understand what counts as scholarly activity.</li> </ul>                                                                                                                                                                                                                                                                                                                                      |
| Tips       | <ul style="list-style-type: none"> <li>• Form coalitions, eg, appoint associate DIOs at major sites and create PGMEC that report to GMEC</li> <li>• Involve stakeholders and increase their awareness and confidence in the process</li> <li>• Use emails to disseminate bite sized information about the processes</li> <li>• Conduct informal Q&amp;A sessions at your hospitals. Reach out to your stakeholders and get them involved in the process early.</li> </ul> | <ul style="list-style-type: none"> <li>• Form coalitions and involve hospital administration through PGMECs and GMEC</li> <li>• Make use of checklists and have review process in place prior to site visits</li> </ul>                                                                   | <p>Completing the application forms:</p> <ul style="list-style-type: none"> <li>• Thorough review of requirements</li> <li>• Review of frequently asked questions</li> <li>• Fill out the form early</li> <li>• Get multiple stakeholders to review it including faculty and residents</li> <li>• Describe the current program clearly, and where deficiencies exist, provide a plan and timeline to meet the requirement</li> <li>• Ensure multiple reviews and proof-reading by DIO and GME Office prior to submission</li> </ul> <p>Core Faculty and Scholarly activities:</p> <ul style="list-style-type: none"> <li>• Carefully select your core faculty in order to meet the faculty to resident ratio</li> </ul> |

Al-Bualy R, Al Lamki N, Al SinanibS, Al Sabti H, MD, Rodanilla R. Preparing for ACGME-I Accreditation: An International Perspective. J Grad Med Educ. 2019;11(4 suppl):10–13.

|  |  |  |                                                                                                                                                                                                                                                                                                                                                                                        |
|--|--|--|----------------------------------------------------------------------------------------------------------------------------------------------------------------------------------------------------------------------------------------------------------------------------------------------------------------------------------------------------------------------------------------|
|  |  |  | <ul style="list-style-type: none"><li>• Ensure that your faculty qualifications meet the requirements. Only appoint those who meet the requirements as core faculty.</li><li>• Provide a detailed list to your faculty with what counts as scholarly activity</li><li>• Encourage faculty to update their CVs regularly. Program administrators may be a good recourse here.</li></ul> |
|--|--|--|----------------------------------------------------------------------------------------------------------------------------------------------------------------------------------------------------------------------------------------------------------------------------------------------------------------------------------------------------------------------------------------|
